# Supplementary material for: Retroviral Infection and Commensal Bacteria Dependently Alter the Metabolomic Profile in a Sterile Organ
Source: MDPI journal article supplement (doi:10.3390/v15020386), 2023-01-29
Supplement: s1 [file s1]

**Table S1: Known metabolites in the sera under positive ionization.** Metabolites identified in the sera of GF, GF infected, *L. murinus* colonized, and *L. murinus* colonized and infected mice under positive ionization.

|                                               |                                                                                  |                                                          |                                                                                         |                                                                                        |                                                    |                                                                                           |                                                       |                                                                           |
|-----------------------------------------------|----------------------------------------------------------------------------------|----------------------------------------------------------|-----------------------------------------------------------------------------------------|----------------------------------------------------------------------------------------|----------------------------------------------------|-------------------------------------------------------------------------------------------|-------------------------------------------------------|---------------------------------------------------------------------------|
| 5-Methylcytidine                              | Creatine                                                                         | Isoleucine                                               | Creatinine                                                                              | Leucine                                                                                | Acetylcarnitine                                    | Cystathionine                                                                             | Linoleoylcarnitine                                    | Alanine                                                                   |
| Cytidine                                      | Lysine                                                                           | Methionine                                               | Nicotinamide                                                                            | Riboflavin                                                                             | Betaine                                            | Glu-Thr                                                                                   | 2'-Deoxycytidine                                      | Carnitine                                                                 |
| 3-Methylcytidine                              | Choline [M]+                                                                     | homocitrulline                                           | Taurine                                                                                 | Hypotaurine                                                                            | Pipecolic acid                                     | Phenylalanine                                                                             | Urea                                                  | Arginine                                                                  |
| Valine                                        | Ornithine                                                                        | Proline                                                  | Citrulline                                                                              | Oleoyl-L-carnitine                                                                     | Serine                                             | N,N-Dimethylarginine                                                                      | Guanidinoacetic acid                                  | Palmitoylcarnitine                                                        |
| 7,8-Dihydrobiopterin                          | gamma-Glutamylleucine                                                            | N6,N6-dimethyllysine                                     | 1-Methyladenosine                                                                       | N-epsilon-Acetyllysine                                                                 | N-.alpha.-Acetyl-L-arginine                        | Palmitoyl sphingomyelin                                                                   | Myristoyl-L-carnitine                                 | Methioninesulf oxide [M+H]+                                               |
| 2-Arachidonoylglycerol                        | Nalpa-acetyl-L-Lysine                                                            | SN-Glycero-3-Phosphocoline                               | 1-Palmitoyl-sn-glycero-3-phosphocoline late                                             | 5-Methyl-2'-deoxycytidine                                                              | N-Oleoyl-D-erythro-sphingosylphosphorylcholine     | Palmitoyleicosapent aenoyl phosphatidylcholine                                            | 1-Stearoyl-2-hydroxy-sn-glycero-3-phosphocoline       | 1-Heptadecanoyl-sn-glycero-3-phosphocoline late                           |
| 1,2-Dilinoleoyl-sn-glycero-3-phosphocoline    | 1-(1Z-Octadecenyl)-2-(5Z,8Z,11Z,14Z-eicosatetraenoyl)-sn-glycero-3-phosphocoline | 1-Oleoyl-sn-glycero-3-phosphoethanolamine                | 1-(1Z-Octadecenyl)-2-(4Z,7Z,10Z,13Z,16Z,19Z-docosahexaenoyl)-sn-glycero-3-phosphocoline | 1-O-Hexadecyl-2-O-(5Z,8Z,11Z,14Z,17Z-eicosapentaenoyl)-sn-glyceryl-3-phosphorylcholine | 1-(1Z-Hexadecenyl)-sn-glycero-3-phosphocoline late | 1-O-Hexadecyl-2-O-(4Z,7Z,10Z,13Z,16Z,19Z-docosahexaenoyl)-sn-glyceryl-3-phosphorylcholine | 1-Stearoyl-2-hydroxy-sn-glycero-3-phosphoethanolamine | 1-Hexadecyl-2-(5Z,8Z,11Z,14Z-eicosatetraenoyl)-sn-glycero-3-phosphocoline |
| 1,2-dioleoyl-sn-glycero-3-phosphatidylcholine | 1-(1Z-Octadecenyl)-sn-glycero-3-phosphocoline early                              | 1-Palmitoyl-2-docosahexaenoyl-sn-glycero-3-phosphocoline | 1-(1Z-Hexadecenyl)-sn-glycero-3-phosphocoline early                                     | 1-Myristoyl-sn-glycero-3-phosphocoline                                                 | 1-O-Octadecyl-sn-glyceryl-3-phosphorylcholine      | 1-O-Hexadecyl-2-O-acetyl-sn-glyceryl-3-phosphorylcholine                                  | 1-(1Z-Octadecenyl)-sn-glycero-3-phosphocoline late    | 1-Palmitoyl-sn-glycero-3-phosphocoline early                              |
| 1,2-Dipalmitoleoyl-sn-glycero-3-phosphocoline |                                                                                  |                                                          |                                                                                         |                                                                                        |                                                    |                                                                                           |                                                       |                                                                           |
