# Supplementary material for: Retroviral Infection and Commensal Bacteria Dependently Alter the Metabolomic Profile in a Sterile Organ
Source: MDPI journal article supplement (doi:10.3390/v15020386), 2023-01-29
Supplement: s1 [file s1]

**Table S4: Identified metabolites found in spleens under negative ionization.** Known metabolites identified in the spleens of GF, GF infected, *L. murinus* colonized, and *L. murinus* colonized and infected mice under negative ionization.

|                      |                                                         |                                                      |                                                           |                        |                                    |                            |                     |
|----------------------|---------------------------------------------------------|------------------------------------------------------|-----------------------------------------------------------|------------------------|------------------------------------|----------------------------|---------------------|
| PE 38:4              | Galactitol                                              | Uracil                                               | Xanthine                                                  | Arginine               | Gly-Asp                            | Taurine                    | myo-Inositol        |
| Threonine            | Hypoxanthine                                            | N-Acetylserine                                       | 2'-Deoxycytidine                                          | Xylitol                | N-Acetylalanine                    | 2-Deoxyuridine             | Allantoin           |
| Aspartic acid        | Glucose                                                 | PC 32:0                                              | Serine                                                    | Threonic acid          | PE 38:6                            | PC 32:1                    | Glutamine           |
| D-Asparagine         | Histidine                                               | Gly-Gly                                              | PS 36:2                                                   | PE 36:4                | Valine                             | Orotic acid                | Glutamic acid       |
| Ribose-5-phosphate   | Tyrosine                                                | Cytidine                                             | Pseudouridine                                             | N-epsilon-Acetyllysine | Glucose-1-phosphate                | Dihydroxyacetone phosphate | Glucose-6-phosphate |
| N,N-Dimethylarginine | Pyroglutamic acid                                       | Palmitoyl sphingomyelin                              | Ribose-1-phosphate                                        | Plasmenyl-PE 38:6      | L-.gamma.-Glutamyl-L-glutamic acid | Plasmenyl-PE 36:4          | Plasmenyl-PE 38:4   |
| O-Phosphocolamine    | 2-Docosahexaenoyl-1-stearoyl-sn-glycero-3-phosphoserine | 1-Stearoyl-2-arachidonoyl-sn-glycero-3-phosphoserine | 1-Palmitoyl-2-docosahexaenoyl-sn-glycero-3-phosphocholine |                        |                                    |                            |                     |
