# Supplementary material for: Retroviral Infection and Commensal Bacteria Dependently Alter the Metabolomic Profile in a Sterile Organ
Source: MDPI journal article supplement (doi:10.3390/v15020386), 2023-01-29
Supplement: s1 [file s1]

**Table S3: Known metabolites found in spleens under positive ionization.** Metabolites identified in the spleens of GF, GF infected, *L. murinus* colonized, and *L. murinus* colonized and infected mice under positive ionization.

|                                                                                           |                                                                                         |                                                                                                |                                                                |                                                      |                                                     |                                                              |                                                 |
|-------------------------------------------------------------------------------------------|-----------------------------------------------------------------------------------------|------------------------------------------------------------------------------------------------|----------------------------------------------------------------|------------------------------------------------------|-----------------------------------------------------|--------------------------------------------------------------|-------------------------------------------------|
| Nicotinamide                                                                              | Ethanolamine                                                                            | Anserine                                                                                       | Tyrosine                                                       | Pyridoxal                                            | Threonine                                           | Valine                                                       | Carnitine                                       |
| Hypoxanthine                                                                              | Pyrazinamide                                                                            | Taurine                                                                                        | Urea                                                           | Tryptophan                                           | Cytidine                                            | Arginine                                                     | Phenylalanine                                   |
| Aspartic acid                                                                             | Methionine                                                                              | Uracil                                                                                         | Xanthine                                                       | Choline [M] <sup>+</sup>                             | Serine                                              | Proline                                                      | Alanine                                         |
| Glutamic acid                                                                             | Asparagine                                                                              | Histidine                                                                                      | Thiamine Cation                                                | Argininosuccinic acid                                | Sphinganine                                         | Glucose-6-phosphate                                          | N-epsilon-Acetyllysine                          |
| 2'-Deoxycytidine                                                                          | N,N-Dimethylarginine                                                                    | Ergothioneine                                                                                  | 3'-O-Methylinosine                                             | Epsilon.-Caprolactam                                 | N-Acetyl-D-glucosamine                              | Palmitoyl sphingomyelin                                      | Nicotinamide riboside cation                    |
| N.epsilon.-Methyl-L-lysine                                                                | Gamma.-Aminobutyric acid                                                                | Methioninesulfoxide [M+H] <sup>+</sup>                                                         | 1,2-Cyclohexanedione                                           | 1,2-Dilinoeoyl-sn-glycerol-3-phosphocholine          | 1-Myristoyl-2-stearoyl-sn-glycerol-3-phosphocholine | (2R)-3-Hydroxyisovaleryl carnitine                           | 1,2-Diarachidonoyl-sn-glycerol-3-phosphocholine |
| 1-O-Hexadecyl-2-O-(4Z,7Z,10Z,13Z,16Z,19Z-docosahexaenoyl)-sn-glycerol-3-phosphorylcholine | 1-(1Z-Octadecenyl)-2-(5Z,8Z,11Z,14Z-eicosatetraenoyl)-sn-glycerol-3-phosphoethanolamine | 1-(1Z-Octadecenyl)-2-(4Z,7Z,10Z,13Z,16Z,19Z-docosahexaenoyl)-sn-glycerol-3-phosphoethanolamine | 2-Docosahexaenoyl-1-stearoyl-sn-glycerol-3-phosphoethanolamine | 1-Stearoyl-2-linoeoyl-sn-glycerol-3-phospho-L-serine | 1,2-Dipentadecanoyl-sn-glycerol-3-phosphocholine    | 2-Arachidonoyl-1-palmitoyl-sn-glycerol-3-phosphoethanolamine | 1,2-dioeoyl-sn-glycerol-3-phosphatidylcholine   |
| 1-Palmitoyl-2-docosahexaenoyl-sn-glycerol-3-phosphocholine                                | 1-Oleoyl-2-myristoyl-sn-glycerol-3-phosphocholine                                       | 2-Oleoyl-1-palmitoyl-sn-glycerol-3-phosphocholine                                              | Nepsilon, Nepsilon-Trimethyllysine                             |                                                      |                                                     |                                                              |                                                 |
