# Supplementary material for: Retroviral Infection and Commensal Bacteria Dependently Alter the Metabolomic Profile in a Sterile Organ
Source: MDPI journal article supplement (doi:10.3390/v15020386), 2023-01-29
Supplement: s1 [file s1]

**Table S2: Metabolites identified in the sera under negative ionization.** Known metabolites in the sera of GF, GF infected, *L. murinus* colonized, and *L. murinus* colonized plus infected mice under negative ionization.

|                         |                        |                        |                                                     |                                                           |                                                        |                                                |                         |
|-------------------------|------------------------|------------------------|-----------------------------------------------------|-----------------------------------------------------------|--------------------------------------------------------|------------------------------------------------|-------------------------|
| Citrulline              | 4-Nitrophenol          | Cytidine               | Allantoin                                           | Hypotaurine                                               | Arabitol                                               | Isoleucine                                     | Adipic acid             |
| Arginine                | Leucine                | Asparagine             | lysoPC 14:0                                         | Citric acid                                               | Vanillin                                               | Thymidine                                      | Taurine                 |
| Serine                  | Pseudouridine          | myo-Inositol           | lysoPC 16:0 early                                   | lysoPC 18:2 late                                          | lysoPC 18:0 late                                       | lysoPE 16:0 late                               | lysoPC 18:2 early       |
| Delta-Hydroxylysine     | lysoPC 18:0 early      | lysoPE 16:0 early      | lysoPC 17:0 late                                    | lysoPC 20:4 late                                          | lysoPC 16:0 late                                       | lysoPC 20:4 early                              | N-Acetylalanine         |
| lysoPC 18:1 late        | lysoPE 18:0 late       | lysoPC 18:1 early      | lysoPE 18:0 early                                   | Pantothenic acid                                          | Methioninesulfoxide                                    | N-epsilon-Acetyllysine                         | N-Acetylleucine         |
| Palmitoyl sphingomyelin | N-Acetylhistidine      | N,N-Dimethylarginine   | N-Methylglutamic acid                               | N-.alpha.-Acetyl-L-ornithine                              | Methyl-beta-galactopyranoside                          | 2-Deoxyuridine                                 | 2-Mercaptobenzothiazole |
| 2-Hydroxypalmitic acid  | Beta.-Glycerophosphate | 3-Hydroxyoctanoic acid | 1-Palmitoyl-2-linoleoyl-sn-glycero-3-phosphocholine | 1-Palmitoyl-2-docosahexaenoyl-sn-glycero-3-phosphocholine | 1-Palmitoyl-2-arachidonoyl-sn-glycero-3-phosphocholine | 1-(1Z-Hexadecenyl)-sn-glycero-3-phosphocholine |                         |
